# Supplementary material for: Part D Plan Switching Among Medicare Beneficiaries With Schizophrenia
Source: Atypon-hosted journal article supplement (doi:10.1176/appi.ps.201400476), 2015-06-15
Supplement: appi.ps.201400476.ds001.pdf [file appi.ps.201400476.ds001.pdf]

## Appendix

Baseline characteristics of the 3 Medicare beneficiary groups with schizophrenia in 2006.

| Variable                      | Value                     | Dual LIS   | Non-Dual LIS | Non-LIS    |
|-------------------------------|---------------------------|------------|--------------|------------|
|                               |                           | (N=93,705) | (N=56,148)   | (N=36,107) |
| Gender (%)                    | Female                    | 45.14      | 44.49        | 54.83      |
| Age (%)                       | 34 or Less                | 14.26      | 8.72         | 2.52       |
|                               | 35 – 64                   | 66.78      | 66.64        | 53.37      |
|                               | 65 – 74                   | 11.16      | 11.86        | 22.58      |
|                               | 75 or More                | 7.81       | 12.78        | 21.52      |
| Race (%)                      | White                     | 61.88      | 68.04        | 79.78      |
|                               | Black                     | 22.21      | 19.55        | 11.11      |
|                               | Hispanic                  | 7.62       | 5.06         | 2.97       |
|                               | Asian                     | 1.81       | 1.02         | 0.97       |
|                               | Other                     | 6.47       | 6.34         | 5.17       |
| PDP Regions (%)               | Alabama, Tennessee (29)   | 3.73       | 3.44         | 3.32       |
|                               | Alaska (25)               | 0.20       | 0.06         | 0.08       |
|                               | Arizona (31)              | 0.73       | 0.55         | 1.02       |
|                               | Arkansas (27)             | 1.08       | 0.79         | 1.07       |
|                               | California (30)           | 12.02      | 1.79         | 4.78       |
|                               | Central New England* (30) | 6.28       | 6.24         | 4.74       |
|                               | Colorado (29)             | 0.72       | 0.77         | 0.90       |
|                               | Florida (30)              | 6.38       | 3.27         | 5.97       |
|                               | Georgia (31)              | 2.71       | 2.50         | 3.38       |
|                               | Hawaii (26)               | 0.46       | 0.14         | 0.11       |
|                               | Idaho, Utah (31)          | 0.86       | 0.29         | 0.64       |
|                               | Illinois(29)              | 4.92       | 7.38         | 4.21       |
|                               | Indiana, Kentucky (30)    | 3.79       | 3.18         | 4.31       |
|                               | Kansas (28)               | 1.05       | 0.45         | 1.26       |
|                               | Louisiana (28)            | 1.77       | 1.61         | 1.40       |
|                               | Michigan (29)             | 4.46       | 4.83         | 4.13       |
|                               | Mid-Atlantic ** (32)      | 2.19       | 2.10         | 2.62       |
|                               | Mississippi (28)          | 1.54       | 0.59         | 1.43       |
|                               | Missouri (28)             | 2.46       | 4.91         | 2.72       |
|                               | Nevada (31)               | 0.40       | 0.34         | 0.47       |
|                               | New Jersey (31)           | 2.94       | 3.44         | 6.35       |
|                               | New Mexico (30)           | 0.50       | 0.31         | 0.34       |
|                               | New York (32)             | 6.59       | 16.28        | 4.98       |
| North Carolina (29)           | 3.51                      | 1.49       | 2.83         |            |
| Northern New England *** (30) | 0.96                      | 1.72       | 0.88         |            |

|                                      |                                                            |       |       |       |
|--------------------------------------|------------------------------------------------------------|-------|-------|-------|
|                                      | Ohio (30)                                                  | 4.31  | 3.54  | 4.41  |
|                                      | Oklahoma (29)                                              | 1.26  | 1.29  | 1.68  |
|                                      | Oregon, Washington (32)                                    | 2.65  | 1.36  | 2.46  |
|                                      | Pennsylvania, West Virginia (33)                           | 3.80  | 5.67  | 7.79  |
|                                      | South Carolina (32)                                        | 1.63  | 1.08  | 1.49  |
|                                      | Texas (33)                                                 | 5.08  | 7.62  | 7.17  |
|                                      | Upper Midwest and Northern Plains (29)                     | 4.59  | 5.58  | 5.34  |
|                                      | Virginia (30)                                              | 2.40  | 2.20  | 3.81  |
|                                      | Wisconsin (29)                                             | 2.05  | 3.20  | 1.89  |
| Institutionalization (%)             | > 90 Days in Skilled Nursing Home                          | 1.67  | 2.23  | 1.16  |
| Chronic Conditions (%)               | Acute Myocardial Infarction                                | 0.40  | 0.48  | 0.70  |
|                                      | Alzheimer's Disease                                        | 5.63  | 8.55  | 9.10  |
|                                      | Alzheimer's Disease, Related Disorders, or Senile Dementia | 15.76 | 21.40 | 20.61 |
|                                      | Atrial Fibrillation                                        | 1.79  | 2.65  | 4.22  |
|                                      | Cataract                                                   | 9.72  | 11.42 | 14.31 |
|                                      | Chronic Kidney Disease                                     | 7.51  | 8.47  | 8.84  |
|                                      | Chronic Obstructive Pulmonary Disease                      | 15.23 | 13.45 | 12.21 |
|                                      | Heart Failure                                              | 13.05 | 15.38 | 14.23 |
|                                      | Diabetes                                                   | 27.59 | 27.82 | 26.65 |
|                                      | Glaucoma                                                   | 4.94  | 5.33  | 6.74  |
|                                      | Hip / Pelvic Fracture                                      | 0.45  | 0.64  | 0.99  |
|                                      | Ischemic Heart Disease                                     | 18.77 | 21.58 | 23.30 |
|                                      | Depression                                                 | 38.55 | 36.89 | 37.81 |
|                                      | Osteoporosis                                               | 5.20  | 5.77  | 9.43  |
|                                      | Rheumatoid Arthritis / Osteoarthritis                      | 13.27 | 13.16 | 16.00 |
|                                      | Stroke / Transient Ischemic Attack                         | 3.43  | 4.53  | 4.48  |
|                                      | Cancer, Breast                                             | 0.78  | 0.85  | 1.65  |
|                                      | Cancer, Colorectal                                         | 0.30  | 0.39  | 0.57  |
|                                      | Cancer, Prostate                                           | 0.42  | 0.66  | 1.06  |
|                                      | Cancer, Lung                                               | 0.27  | 0.33  | 0.43  |
|                                      | Cancer, Endometrial                                        | 0.07  | 0.09  | 0.20  |
| No. of CCW Chronic Conditions (Mean) |                                                            | 1.83  | 2.00  | 2.14  |

\* Connecticut, Massachusetts, Rhode Island, and Vermont

\*\* Delaware, District of Columbia and Maryland

\*\*\* New Hampshire and Maine

\*\*\*\* Iowa, Minnesota, Montana, Nebraska, North Dakota, South Dakota and Wyoming

Frequency and timing of switching behavior in 2006 among three groups of Medicare beneficiaries with schizophrenia

|                                |           | <b>Dual LIS<br/>(N=93,705)</b> | <b>Non-Dual<br/>LIS<br/>(N=56,148)</b> | <b>Non-LIS<br/>(N=36,107)</b> |
|--------------------------------|-----------|--------------------------------|----------------------------------------|-------------------------------|
| Switch (%)                     |           | 10.69                          | 9.80                                   | 5.50                          |
| Number of Switching Events (%) | 0         | 89.31                          | 90.20                                  | 94.50                         |
|                                | 1         | 9.74                           | 9.08                                   | 5.15                          |
|                                | 2         | 0.84                           | 0.66                                   | 0.34                          |
|                                | 3         | 0.09                           | 0.06                                   | 0.02                          |
|                                | 4         | 0.01                           | 0.00                                   | 0.00                          |
| Month of Switch (%)            | February  | 3.67                           | 2.45                                   | 0.81                          |
|                                | March     | 1.38                           | 1.19                                   | 0.64                          |
|                                | April     | 1.23                           | 1.26                                   | 0.89                          |
|                                | May       | 1.16                           | 1.28                                   | 1.02                          |
|                                | June      | 1.27                           | 1.91                                   | 1.22                          |
|                                | July      | 0.41                           | 0.42                                   | 0.19                          |
|                                | August    | 0.36                           | 0.28                                   | 0.15                          |
|                                | September | 0.41                           | 0.33                                   | 0.21                          |
|                                | October   | 0.32                           | 0.28                                   | 0.15                          |
|                                | November  | 0.25                           | 0.22                                   | 0.13                          |
|                                | December  | 0.23                           | 0.18                                   | 0.08                          |
